# Supplementary material for: Bragg extraction of light in 2D photonic Thue–Morse quasicrystals patterned in active CdSe/CdS nanorod–polymer nanocomposites
Source: Royal Society of Chemistry journal article supplement (doi:10.1039/c2nr31839c), 2012-10-30
Supplement: c2nr31839c.pdf [file c2nr31839c.pdf]

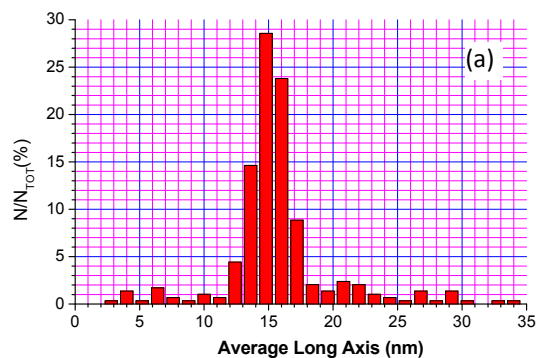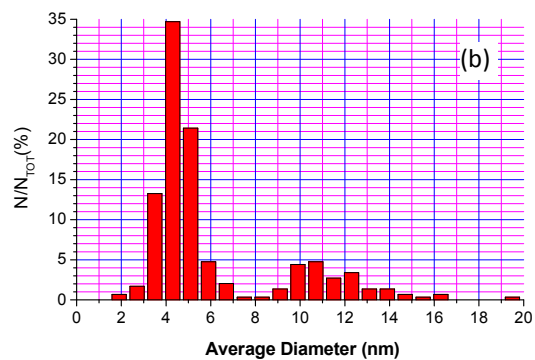

Supp. Info: Histogram of the particles' long axis size distribution (b) and diameter distribution (c) inside the stock solution. The distribution plots were evaluated by computerised image analysis from several TEM micrographs.
